# Supplementary material for: Probing Heme Active Sites of Hemoglobin in Functional Red Blood Cells Using Resonance Raman Spectroscopy
Source: PubMed Central journal article supplement (PMC8154613; doi:10.1021/acs.jpcb.1c01199), 2021-03-31
Supplement: jp1c01199_si_001.pdf [file jp1c01199_si_001.pdf]

## **Supplemental Information**

### **Probing heme active site of hemoglobin in functional red blood cells using resonance Raman spectroscopy**

J. Dybas<sup>a,b\*</sup>, T. Chiura<sup>a</sup>, K. M. Marzec<sup>b</sup>, P. J. Mak<sup>a\*</sup>

<sup>a</sup> *Saint Louis University, Chemistry Department, 3501 Laclede Ave., 63103 Saint Louis, Missouri, United States*

<sup>b</sup> *Jagiellonian University, Jagiellonian Centre for Experimental Therapeutics (JCET), 14 Bobrzyńskiego Str., 30–348 Krakow, Poland*

**This material includes:**

**Figure S1.**

**Figure S2.**

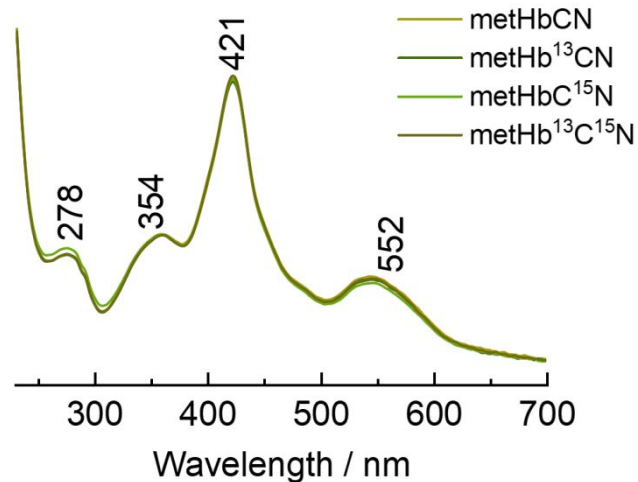

**Fig. S1.** The UV-Vis absorption spectra of HbCN isotopic derivatives (Hb<sup>13</sup>CN, HbC<sup>15</sup>N and Hb<sup>13</sup>C<sup>15</sup>N).

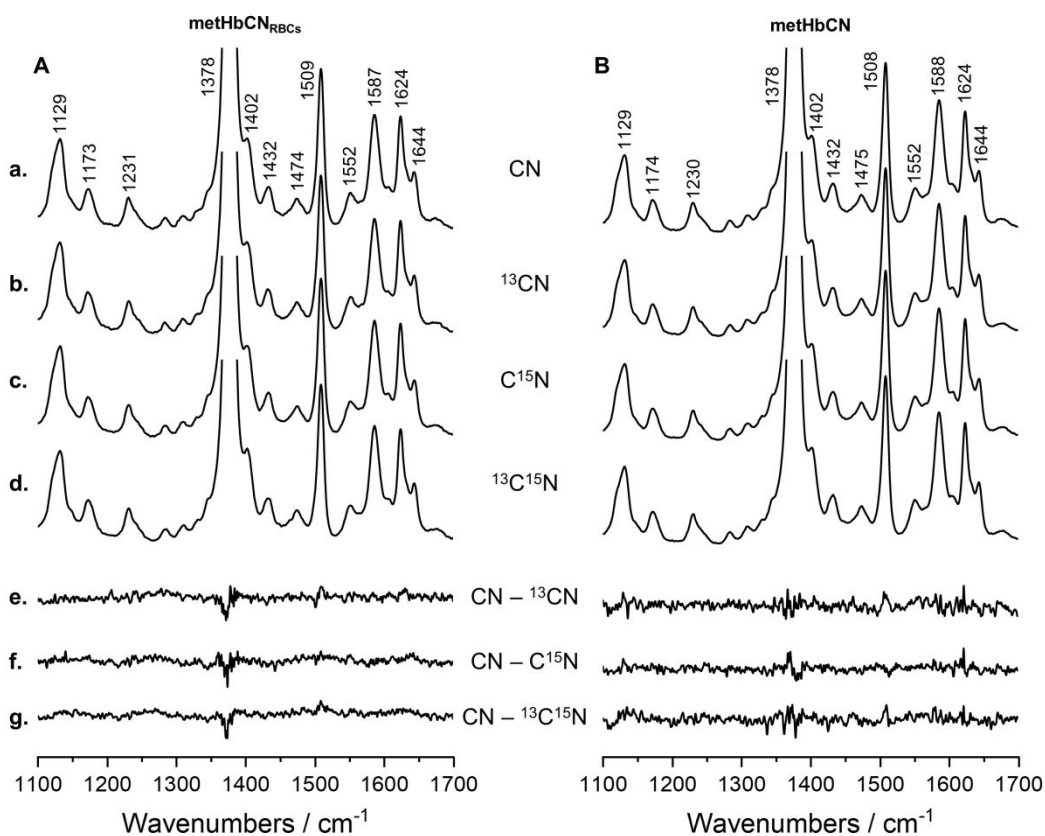

**Fig. S2.** rR spectra of RBCs rich in methHb (A) and isolated methHb (B) treated with potassium cyanide (a) and its isotopic analogues (K<sup>13</sup>CN – b, KC<sup>15</sup>N – c, K<sup>13</sup>C<sup>15</sup>N – d) in 10-fold molar excess compared to the heme concentration. Spectra were recorded using 406.7 nm excitation line with power at the sample set approximately on 5 mW and are presented in middle wavenumber region (1100 – 1700 cm<sup>-1</sup>) with appropriate difference patterns (e-g). All spectra were averaged from 3 independent experiments from 3 single spectra in total (1 spectrum per experiment). Acquisition time was equal to 5 min per spectrum (10 s and 30 accumulations).
